# Supplementary material for: Association of Escherichia coli pathotypes with fecal markers of enteropathy and nutritional status among underweight adults in Bangladesh
Source: Front Cell Infect Microbiol. 2025 Apr 10;15:1553688. doi: 10.3389/fcimb.2025.1553688 (PMC12018316; doi:10.3389/fcimb.2025.1553688)
Supplement: Supplementary file 1 [file Table1.xlsx]

## Sheet: Table S1
Table S1
Occurance of co-infection between E.coli pathotypes and other intestinal pathogens
	EAEC			tEPEC			aEPEC			ETEC			ST_ETEC			LT_ETEC			shigella_EIEC			STEC
	Positive	Negative	P-value	Positive	Negative	P-value	Positive	Negative	P-value	Positive	Negative	P-value	Positive	Negative	P-value	Positive	Negative	P-value	Positive	Negative	P-value	Positive	Negative	P-value
EAEC, n(%)				21(67)	302(61)	0.471	197(72)	127(50)	0	194(76)	129(48)	0	159(78)	164(51)	0	35(66)	288(61)	0.488	151(64)	173(60)	0.393	21(60)	303(62)	0.829
tEPEC, n(%)	21(7)	10(5)	0.471				0(0)	31(12)	0	17(7)	14(5)	0.492	14(7)	17(5)	0.449	3(6)	28(6)	0.934	12(5)	19(7)	0.465	5(15)	26(5)	0.025
aEPEC, n(%)	197(61)	76(38)	0	0(0)	273(55)	0				146(57)	127(47)	0.027	125(62)	148(46)	0.001	21(40)	252(54)	0.055	130(55)	143(50)	0.235	0(0)	273(56)	0
ETEC, n(%)	194(60)	62(31)	0	17(55)	239(48)	0.492	146(53)	110(44)	0.027				203(100)	53(17)	0	53(100)	203(43)	0	124(53)	132(46)	0.126	23(68)	233(48)	0.023
ST_ETEC, n(%)	159(49)	44(22)	0	14(45)	189(38)	0.449	125(46)	78(31)	0.001	203(79)	0(0)	0				0(0)	203(43)	0	103(44)	100(35)	0.037	6(47)	187(38)	0.303
LT_ETEC, n(%)	35(10)	18(9)	0.488	3(7)	50(10)	0.934	21(8)	12(13)	0.055	53(21)	0(0)	0	0(0)	53(17)	0				21(9)	32(11)	0.403	7(21)	46(9)	0.036
shigella_EIEC, n(%)	151(47)	86(43)	0.393	12(39)	224(45)	0.465	130(48)	107(42)	0.235	124(48)	112(42)	0.126	103(51)	133(41)	0.037	21(40)	215(46)	0.403				18(51)	219(45)	0.439
STEC, n(%)	21(6)	14(7)	0.829	5(16)	39(6)	0.025	0(0)	35(14)	0	23(9)	11(4)	0.023	16(8)	18(6)	0.303	7(13)	27(6)	0.036	18(8)	17(6)	0.439
Human adenovirus (HAdV) types F40 and F41, n(%)	8(2)	3(1)	0.445	1(3)	10(2)	0.652	6(2)	5(2)	0.87	6(2)	5(2)	0.703	4(2)	7(2)	0.87	2(4)	9(2)	0.37	7(3)	4(1)	0.21	0(0)	11(2)	0.377
Adenovirus-Pan Genome, n(%)	68(21)	32(16)	0.146	8(26)	92(19)	0.326	43(16)	57(23)	0.043	47(18)	53(20)	0.68	38(19)	62(19)	0.866	9(17)	91(19)	0.681	54(23)	46(16)	0.045	6(18)	94(19)	0.825
Aeromonas, n(%)	37(11)	22(11)	0.848	4(13)	55(11)	0.768	36(13)	23(9)	0.141	31(12)	28(10)	0.537	24(12)	35(11)	0.731	7(13)	52(11)	0.64	34(14)	25(9)	0.04	7(21)	52(11)	0.076
Ancyclostoma, n(%)	4(1)	0(0)	0.113	0(0)	4(1)	0.615	3(1)	1(0.4)	0.357	2(1)	2(1)	0.963	2(1)	2(1)	0.643	0(0)	4(1)	0.501	3(1)	1(0.3)	0.227	0(0)	4(1)	0.597
Ascaris, n(%)	12(4)	9(4)	0.665	1(3)	20(4)	0.819	4(1)	17(7)	0.002	10(4)	11(4)	0.908	8(4)	13(4)	0.951	2(4)	19(4)	0.927	11(5)	10(3)	0.49	2(6)	19(4)	0.564
Astrovirus, n(%)	3(1)	1(0.5)	0.583	0(0)	4(1)	0.615	2(1)	2(1)	0.936	1(0.3)	3(1)	0.338	1(0.5)	3(1)	0.571	0(0)	4(1)	0.501	0(0)	4(1)	0.069	0(0)	4(1)	0.592
Blastocystis, n(%)	261(81)	151(75)	0.123	22(71)	389(79)	0.286	230(85)	182(72)	0.001	206(81)	205(76)	0.232	168(83)	243(76)	0.043	38(72)	373(79)	0.197	194(82)	218(76)	0.071	26(74)	386(79)	0.517
Bacteroides fragilis, n(%)	38(12)	18(9)	0.311	3(10)	53(11)	0.851	33(12)	23(9)	0.279	26(10)	30(11)	0.701	18(9)	38(12)	0.284	8(15)	48(10)	0.273	26(11)	30(10)	0.825	4(12)	52(11)	0.833
Campylobacter jejuni, n(%)	23(7)	16(8)	0.722	2(6)	37(8)	0.828	23(8)	13(6)	0.372	19(7)	20(7)	0.986	17(8)	22(7)	0.518	2(4)	37(8)	0.283	21(9)	18(6)	0.25	4(12)	35(7)	0.321
Campylobacter-Pan Genome, n(%)	44(14)	30(15)	0.671	3(10)	71(14)	0.459	38(14)	36(14)	0.86	31(12)	43(16)	0.196	29(14)	45(14)	0.954	2(4)	72(15)	0.024	43(18)	31(11)	0.016	3(9)	71(15)	0.355
Cryptosporidium, n(%)	8(2)	2(1)	0.226	1(3)	9(2)	0.582	8(3)	2(1)	0.074	5(2)	5(2)	0.946	5(2)	5(2)	0.464	0(0)	10(2)	0.284	4(2)	6(2)	0.752	0(0)	10(2)	0.4
Cyclospora, n(%)
Clotridiodies difficile, n(%)	1(0.3)	0(0)	0.428	0(0)	1(0.2)	0.801	0(0)	1(0.4)	0.296	0(0)	1(0.3)	0.33	0(0)	1(0.3)	0.428	0(0)	1(0.2)	0.737	0(0)	1(0.3)	0.365	0(0)	1(0.2)	0.792
Entamoeba - Pan Genome, n(%)	40(12)	27(13)	0.727	6(19)	61(12)	0.259	33(12)	34(14)	0.618	31(12)	36(13)	0.65	23(11)	44(13)	0.427	8(15)	59(13)	0.596	33(14)	34(12)	0.458	2(6)	65(13)	0.213
Enterocytozoon bieneusi, n(%)	9(3)	2(1)	0.166	1(3)	10(2)	0.653	5(2)	6(2)	0.651	6(2)	5(2)	0.707	6(3)	5(2)	0.279	0(0)	11(2)	0.26	9(4)	2(1)	0.013	0(0)	11(2)	0.377
Entamoeba histolytica, n(%)	3(1)	3(1)	0.555	1(3)	5(1)	0.262	2(1)	4(2)	0.355	5(2)	1(0.3)	0.089	2(1)	4(1)	0.785	3(6)	3(1)	0.001	3(1)	3(1)	0.806	0(0)	6(1)	0.516
Encephalitozoon intestinalis, n(%)	1(0.3)	0(0)	0.431	0(0)	1(0.2)	0.802	0(0)	1(0.4)	0.296	0(0)	1(0.3)	0.327	0(0)	1(0.3)	0.425	0(0)	1(0.2)	0.737	1(0.4)	0(0)	0.27	0(0)	1(0.2)	0.792
Hymenolepis nana, n(%)	5(2)	7(3)	0.15	0(0)	12(2)	0.38	7(3)	5(2)	0.662	6(2)	6(2)	0.936	5(2)	7(2)	0.833	1(2)	11(2)	0.836	7(3)	5(2)	0.349	0(0)	12(2)	0.356
Helicobacter pylori, n(%)	21(7)	14(7)	0.836	1(3)	34(7)	0.427	18(7)	17(7)	0.934	18(7)	17(6)	0.753	15(7)	20(6)	0.605	3(6)	32(7)	0.754	17(7)	18(6)	0.664	3(9)	32(7)	0.605
Isospora, n(%)	2(0.6)	0(0)	0.264	1(3)	1(0.2)	0.008	0(0)	2(1)	0.139	2(1)	0(0)	0.147	2(1)	0(0)	0.075	0(0)	2(0.4)	0.635	1(0.4)	1(0.3)	0.888	1(3)	1(0.2)	0.012
Mycobacterium tuberculosis, n(%)	2(0.6)	0(0)	0.263	0(0)	2(0.4)	0.722	2(1)	0(0)	0.175	1(0.3)	1(0.3)	0.976	1(0.5)	1(0.3)	0.745	0(0)	2(0.4)	0.634	1(0.4)	1(0.3)	0.89	0(0)	2(0.4)	0.709
Necator, n(%)
Norovirus- Genogroup GI (G1), n(%)	12(4)	5(2)	0.444	1(3)	16(3)	0.995	10(4)	7(3)	0.567	9(4)	8(3)	0.732	7(3)	10(3)	0.834	2(4)	15(3)	0.819	9(4)	8(3)	0.511	1(3)	16(3)	0.895
Norovirus- Genogroup GII (G2), n(%)	21(6)	19(9)	0.212	4(13)	36(7)	0.255	23(8)	17(7)	0.469	16(6)	24(9)	0.244	13(6)	27(8)	0.399	3(6)	37(8)	0.568	20(8)	20(7)	0.521	3(9)	37(8)	0.826
Plesiomonas, n(%)	59(18)	21(10)	0.014	7(23)	73(15)	0.248	48(18)	32(13)	0.125	56(22)	24(9)	0	45(22)	35(11)	0	11(21)	69(15)	0.247	39(17)	41(14)	0.466	12(35)	68(14)	0.001
Rotavirus, n(%)	4(1)	1(0.5)	0.401	0(0)	5(1)	0.573	4(1)	1(0.4)	0.206	2(1)	3(1)	0.688	2(1)	3(1)	0.956	0(0)	5(1)	0.451	2(1)	3(1)	0.82	0(0)	5(1)	0.548
Salmonella, n(%)	3(1)	1(0.5)	0.581	1(3)	3(0.6)	0.104	2(1)	2(1)	0.933	3(1)	1(0.3)	0.294	3(1)	1(0.3)	0.135	0(0)	4(1)	0.501	4(2)	0(0)	0.027	1(3)	3(0.6)	0.131
Sapovirus, n(%)	16(5)	8(4)	0.609	3(10)	21(4)	0.162	13(5)	11(4)	0.828	14(5)	10(4)	0.342	10(5)	14(4)	0.763	4(8)	20(4)	0.276	9(4)	15(5)	0.441	0(0)	24(5)	0.18
Schistosoma, n(%)
Strongyloides, n(%)	1(0.3)	4(2)	0.054	0(0)	5(1)	0.573	2(1)	3(1)	0.586	2(1)	3(1)	0.691	2(1)	3(1)	0.954	0(0)	5(1)	0.451	4(2)	1(0.3)	0.114	0(0)	5(1)	0.554
Trichuris, n(%)	72(22)	53(26)	0.287	7(23)	118(24)	0.864	64(23)	61(24)	0.818	63(25)	62(23)	0.692	47(23)	78(24)	0.764	16(30)	109(23)	0.254	91(39)	34(12)	0	13(38)	112(23)	0.042
Vibrio cholerae, n(%)	3(1)	4(2)	0.304	0(0)	7(1)	0.504	3(1)	4(2)	0.622	3(1)	4(1)	0.749	3(1)	4(1)	0.822	0(0)	7(1)	0.372	4(2)	3(1)	0.517	1(3)	6(1)	0.399
Cryptosporidium hominis, n(%)	2(0.6)	0(0)	0.264	0(0)	2(0.4)	0.722	2(1)	0(0)	0.174	2(1)	0(0)	0.147	2(1)	0(0)	0.075	0(0)	2(0.4)	0.635	0(0)	2(1)	0.2	0(0)	2(0.4)	0.709
Cryptosporidium parvum, n(%)	1(0.3)	0(0)	0.43	0(0)	1(0.2)	0.802	1(0.3)	0(0)	0.337	1(0.3)	0(0)	0.306	1(0.5)	0(0)	0.208	0(0)	1(0.2)	0.737	1(0.4)	0(0)	0.269	0(0)	1(0.2)	0.792
Giardia-A, n(%)	5(2)	1(0.5)	0.272	0(0)	6(1)	0.537	4(1)	2(1)	0.473	3(1)	3(1)	0.955	2(1)	4(1)	0.785	1(2)	5(1)	0.592	2(1)	4(1)	0.562	0(0)	6(1)	0.516
Giardia-B, n(%)	23(7)	19(9)	0.339	4(13)	38(8)	0.301	15(5)	27(11)	0.027	18(7)	24(9)	0.417	14(7)	28(9)	0.453	4(8)	38(8)	0.895	24(10)	18(6)	0.1	2(6)	40(8)	0.636
Norovirus- Genogroup GI.1, n(%)	1(0.3)	0(0)	0.43	0(0)	1(0.2)	0.802	1(0.3)	0(0)	0.336	0(0)	1(0.3)	0.328	0(0)	1(0.3)	0.426	0(0)	1(0.2)	0.737	1(0.4)	0(0)	0.27	0(0)	1(0.2)	0.789
Norovirus- Genogroup GII.4, n(%)	2(0.6)	3(1)	0.316	1(3)	4(1)	0.18	2(1)	3(1)	0.589	1(0.3)	4(1)	0.195	1(0.5)	4(1)	0.387	0(0)	5(1)	0.451	3(1)	2(1)	0.502	1(3)	4(1)	0.23
