# Supplementary material for: Association of Escherichia coli pathotypes with fecal markers of enteropathy and nutritional status among underweight adults in Bangladesh
Source: Front Cell Infect Microbiol. 2025 Apr 10;15:1553688. doi: 10.3389/fcimb.2025.1553688 (PMC12018316; doi:10.3389/fcimb.2025.1553688)
Supplement: Supplementary file 2 [file Table2.xlsx]

## Sheet: Table S2
Table S2
Correlation between different forms of E. coli and EED biomarkers
Biomarkers	EAEC
	Yes	No	P-value
MPO, Median [Q1, Q3] (ng/mL)	736.25 [359.75, 1435.75]	736.50 [347.50, 1662.00]	0.76
NEO, Median [Q1, Q3] (nmol/L)	1006.50 [358.00, 1862.00]	1031.00 [474.00, 1781.00]	0.814
AAT, Median [Q1, Q3] (mg/g)	0.15 [0.06, 0.30]	0.13 [0.05, 0.29]	0.477
Calprotectin, Median [Q1, Q3] (µg/g)	93.75 [45.97, 183.18]	82.86 [38.54, 183.36]	0.568
REG1B, Median [Q1, Q3] (µg/mL)	1.48 [0.51, 5.96]	1.20 [0.62, 4.95]	0.986
	tEPEC
	Yes	No	P-value			MPO	NEO	Calprotectin
MPO, Median [Q1, Q3] (ng/mL)	690.00 [313.50, 1198.00]	736.50 [354.50, 1459.50]	0.846		EAEC positive	736.25	1006.5	93.75
NEO, Median [Q1, Q3] (nmol/L)	784.00 [307.00, 2115.00]	1012.00 [400.00, 1816.00]	0.886		EAEC negative	736.5	1031	82.86
AAT, Median [Q1, Q3] (mg/g)	0.19 [0.06, 0.45]	0.14 [0.05, 0.29]	0.128		tEPEC positive	690	784	93.52
Calprotectin, Median [Q1, Q3] (µg/g)	93.52 [62.38, 143.01]	88.52 [40.85, 183.75]	0.6		tEPEC negative	736.5	1012	88.52
REG1B, Median [Q1, Q3] (µg/mL)	4.77 [0.34, 21.00]	1.27 [0.55, 5.22]	0.128		aEPEC positive	800	986	101.72
	aEPEC				aEPEC negative	608.5	1018	83.03
	Yes	No	P-value		ETEC positive	770	814	96.46
MPO, Median [Q1, Q3] (ng/mL)	800 [411, 1490]	608.5 [303.63, 1417.5]	0.027		ETEC negative	706.25	1165	81.89
NEO, Median [Q1, Q3] (nmol/L)	986 [396, 1851]	1018 [369, 1803]	0.631		ST_ETEC positive	825	800	96.96
AAT, Median [Q1, Q3] (mg/g)	0.13 [0.05, 0.27]	0.15 [0.06, 0.35]	0.194		ST_ETEC negative	666.5	1162	82.76
Calprotectin, Median [Q1, Q3] (µg/g)	101.72 [45.58, 189.98]	83.03 [40.54, 180.71]	0.337		LT_ETEC positive	584	849	93.93
REG1B, Median [Q1, Q3] (µg/mL)	1.56 [0.51, 5.73]	1.21 [0.58, 5.25]	0.79		LT_ETEC negative	740	1011	88.34
	ETEC				Shigella/EIEC positive	754	968	111.62
	Yes	No	P-value		Shigella/EIEC negative	709.75	1078.5	80.16
MPO, Median [Q1, Q3] (ng/mL)	770 [381, 1550]	706.25 [345, 1375.25]	0.252		STEC positive	768	968	99.89
NEO, Median [Q1, Q3] (nmol/L)	814 [352, 1796]	1165 [435.5, 1876]	0.083		STEC negative	736.25	1011.5	88.43
AAT, Median [Q1, Q3] (mg/g)	0.15 [0.07, 0.30]	0.13 [0.05, 0.29]	0.177
Calprotectin, Median [Q1, Q3] (µg/g)	96.46 [47.67, 184.78]	81.89 [37.04, 181.52]	0.253
REG1B, Median [Q1, Q3] (µg/mL)	1.26 [0.51, 4.99]	1.43 [0.62, 6.59]	0.17			AAT	REG1B
	ST_ETEC				EAEC positive	0.15	1.48
	Yes	No	P-value		EAEC negative	0.13	1.2
MPO, Median [Q1, Q3] (ng/mL)	825 [372.5, 1682.5]	666.5 [347.5, 1329]	0.062		tEPEC positive	0.19	4.77
NEO, Median [Q1, Q3] (nmol/L)	800 [335, 1796]	1162 [446, 1842]	0.067		tEPEC negative	0.14	1.27
AAT, Median [Q1, Q3] (mg/g)	0.16 [0.06, 0.32]	0.13 [0.05, 0.27]	0.137		aEPEC positive	0.13	1.56
Calprotectin, Median [Q1, Q3] (µg/g)	96.96 [47.67, 192.96]	82.76 [37.22, 172.08]	0.102		aEPEC negative	0.15	1.21
REG1B, Median [Q1, Q3] (µg/mL)	1.22 [0.51, 4.77]	1.4 [0.64, 6.79]	0.115		ETEC positive	0.15	1.26
	LT_ETEC				ETEC negative	0.13	1.43
	Yes	No	P-value		ST_ETEC positive	0.16	1.22
MPO, Median [Q1, Q3] (ng/mL)	584 [392, 1118.5]	740 [348.75, 1513]	0.264		ST_ETEC negative	0.13	1.4
NEO, Median [Q1, Q3] (nmol/L)	849 [448,1796]	1011 [380, 1827]	0.929		LT_ETEC positive	0.14	1.34
AAT, Median [Q1, Q3] (mg/g)	0.14 [0.07, 0.24]	0.14 [0.05, 0.31]	0.868		LT_ETEC negative	0.14	1.32
Calprotectin, Median [Q1, Q3] (µg/g)	93.93 [47.67, 135.37]	88.34 [41.77, 189.98]	0.458		Shigella/EIEC positive	0.13	1.13
REG1B, Median [Q1, Q3] (µg/mL)	1.34 [0.64, 8.54]	1.32 [0.51, 5.35]	0.788		Shigella/EIEC negative	0.16	1.71
	Shigella/EIEC				STEC positive	0.22	2.01
	Yes	No	P-value		STEC negative	0.13	1.31
MPO, Median [Q1, Q3] (ng/mL)	754 [362.5, 1479.5]	709.75 [347.5, 1430]	0.589
NEO, Median [Q1, Q3] (nmol/L)	968 [446, 1754]	1078.5 [344.5, 1911.5]	0.801
AAT, Median [Q1, Q3] (mg/g)	0.13 [0.06, 0.27]	0.16 [0.06,0.32]	0.689
Calprotectin, Median [Q1, Q3] (µg/g)	111.62 [51.48, 204.26]	80.16 [36.58,161.44]	0.007
REG1B, Median [Q1, Q3] (µg/mL)	1.13 [0.5, 5.22]	1.71 [0.64, 6.30]	0.111
	STEC
	Yes	No	P-value
MPO, Median [Q1, Q3] (ng/mL)	768 [255.5, 1479.5]	736.25 [357, 1459.5]	0.547
NEO, Median [Q1, Q3] (nmol/L)	968 [421, 1514]	1011.5 [391, 1851]	0.606
AAT, Median [Q1, Q3] (mg/g)	0.22 [0.1, 0.67]	0.13 [0.05, 0.29]	0.006
Calprotectin, Median [Q1, Q3] (µg/g)	99.89 [53.79, 197.54]	88.43 [40.46, 183.36]	0.268
REG1B, Median [Q1, Q3] (µg/mL)	2.01 [0.91, 6.06]	1.31 [0.51, 5.36]	0.148

## Sheet: Graph SG1
	MPO	NEO	Calprotectin
EAEC positive	736.25	1006.5	93.75
EAEC negative	736.5	1031	82.86
tEPEC positive	690	784	93.52
tEPEC negative	736.5	1012	88.52
aEPEC positive	800	986	101.72
aEPEC negative	608.5	1018	83.03
ETEC positive	770	814	96.46
ETEC negative	706.25	1165	81.89
ST_ETEC positive	825	800	96.96
ST_ETEC negative	666.5	1162	82.76
LT_ETEC positive	584	849	93.93
LT_ETEC negative	740	1011	88.34
shigella_EIEC positive	754	968	111.62
shigella_EIEC negative	709.75	1078.5	80.16
STEC positive	768	968	99.89
STEC negative	736.25	1011.5	88.43

## Sheet: Graph SG2
	AAT	REG1B
EAEC positive	0.15	1.48
EAEC negative	0.13	1.2
tEPEC positive	0.19	4.77
tEPEC negative	0.14	1.27
aEPEC positive	0.13	1.56
aEPEC negative	0.15	1.21
ETEC positive	0.15	1.26
ETEC negative	0.13	1.43
ST_ETEC positive	0.16	1.22
ST_ETEC negative	0.13	1.4
LT_ETEC positive	0.14	1.34
LT_ETEC negative	0.14	1.32
shigella_EIEC positive	0.13	1.13
shigella_EIEC negative	0.16	1.71
STEC positive	0.22	2.01
STEC negative	0.13	1.31
