# Supplementary material for: Association of Escherichia coli pathotypes with fecal markers of enteropathy and nutritional status among underweight adults in Bangladesh
Source: Front Cell Infect Microbiol. 2025 Apr 10;15:1553688. doi: 10.3389/fcimb.2025.1553688 (PMC12018316; doi:10.3389/fcimb.2025.1553688)
Supplement: Supplementary file 4 [file Table4.xlsx]

## Sheet: TableS4-E.coli pathotypes & BMI
Table S4
Association of E. coli pathotypes with BMI in adults
Characteristics	BMI
AAT	-0.08 [-0.44, 0.28]
MPO	0.00 [-0.07, 0.06]
NEO	0.03 [-0.02, 0.08]
Calprotectin	0.00 [-0.07, 0.08]
REG1B	-0.04 [-0.08, 0.01]
Age in years	0.01 [-0.01, 0.02]
Female sex	-0.08 [-0.29, 0.13]
Use water treatment	-0.04 [-0.22, 0.13]
Improved sanitation	-0.01 [-0.24, 0.23]
Income in USD	0.00 [-0.00, 0.00]
Housewife's years of schooling	-0.06 [-0.12, 0.01]
Houshold asset index	-0.03 [-0.09, 0.02]
Wash hand before cooking	0.18 [-0.04, 0.40]
Wash hand after toilet	0.09 [-0.12, 0.29]
Use toilet paper	0.14 [-0.05, 0.34]
Enteroaggregative E. coli positive	0.03 [-0.15, 0.21]
Enterotoxigenic E. coli positive	0.11 [-0.06, 0.28]
Shigella and Enteroinvasive E. coli positive	0.16 [-0.00, 0.32]
Shiga toxin producing E.coli positive	0.13 [-0.21, 0.47]
Enteropathogenic E. coli positive	0.04 [-0.13, 0.21]
Zinc level	-0.59 [-1.19, 0.01]
Ferritin level	0.00 [-0.00, 0.00]
Adjusted in linear regression model for age, sex, asset Index (including household all assets); housewife's years of education; wash indices (hand wash with soap before preparing food, hand wash with soap after using toilet, always use toilet paper); individual E. coli pathotypes; water treatment; EED biomarkers (AAT, MPO, NEO, calprotectin, Reg1B); zinc; ferritin.
Dependent variable: BMI; Independent variables: Infection with E. coli pathotypes.
Column represents an individual model. Biomarker values were log-transformed prior to analysis. The adjusted coefficient with 95% confidence interval (CI) has been reported. The asterisk (*) denotes the statistical significance with a p-value < 0.05.

## Sheet: E. coli sub types with BMI
Association of E. coli pathotypes (with sub-types) with BMI in adults
Characteristics	BMI
AAT	-0.12 [-0.49, 0.24]
MPO	0.00 [-0.07, 0.07]
NEO	0.03 [-0.02, 0.08]
Calprotectin	0.00 [-0.07, 0.08]
REG1B	-0.04 [-0.08, 0.01]
Age in years	0.01 [-0.01, 0.02]
Female sex	-0.05 [-0.26, 0.15]
Use water treatment	-0.04 [-0.21, 0.13]
Improved sanitation	-0.02 [-0.25, 0.22]
Income in USD	0.00 [-0.00, 0.00]
Housewife's years of schooling	-0.06 [-0.12, 0.01]
Houshold asset index	-0.03 [-0.08, 0.03]
Wash hand before cooking	0.20 [-0.02, 0.42]
Wash hand after toilet	0.08 [-0.12, 0.29]
Use toilet paper	0.14 [-0.05, 0.34]
Enteroaggregative E. coli positive	0.03 [-0.15, 0.20]
Heat Stable Enterotoxigenic E. coli positive	0.16 [-0.02, 0.35]
Heat Labile Enterotoxigenic E. coli Positive	-0.06 [-0.35, 0.22]
Shigella and Enteroinvasive E. coli positive	0.16 [-0.00, 0.32]
Shiga toxin producing E.coli positive	0.07 [-0.27, 0.42]
Typical Enteropathogenic E. coli positive	0.29 [-0.05, 0.63]
Atypical Enteropathogenic E. coli positive	-0.01 [-0.19, 0.17]
Zinc level	-0.56 [-1.16, 0.04]
Ferritin level	0.00 [-0.00, 0.00]
Adjusted in linear regression model for age, sex, asset Index (including household all assets); housewife's years of education; wash indices (hand wash with soap before preparing food, hand wash with soap after using toilet, always use toilet paper); individual E. coli pathotypes; water treatment; EED biomarkers (AAT, MPO, NEO, calprotectin, Reg1B); zinc; ferritin.
Dependent variable: BMI; Independent variables: Infection with E. coli pathotypes.
Each column represents an individual model. Biomarker values were log-transformed prior to analysis. The adjusted coefficient with 95% confidence interval (CI) has been reported. The asterisk (*) denotes the statistical significance with a p-value < 0.05.
