# Supplementary material for: Association of Escherichia coli pathotypes with fecal markers of enteropathy and nutritional status among underweight adults in Bangladesh
Source: Front Cell Infect Microbiol. 2025 Apr 10;15:1553688. doi: 10.3389/fcimb.2025.1553688 (PMC12018316; doi:10.3389/fcimb.2025.1553688)
Supplement: Supplementary file 5 [file Table5.xlsx]

## Sheet: Table S5
Table S5
Association between infection with sub types of E. coli pathotypes and EED biomarkers
Characteristics	MPO	NEO	REG1B	AAT	Calprotectin
Age in years	-0.03 [-0.05, -0.01] *	0.03 [0.00, 0.05] *	-0.03 [-0.06, 0.00]	0.00 [-0.01, 0.00]	-0.03 [-0.05, -0.01] *
Female sex	0.33 [0.01, 0.65] *	0.18 [-0.20, 0.55]	-0.20 [-0.67, 0.27]	-0.01 [-0.07, 0.05]	0.25 [-0.04, 0.54]
Use water treatment	-0.16 [-0.42, 0.11]	-0.21 [-0.52, 0.11]	0.08 [-0.32, 0.47]	-0.01 [-0.06, 0.04]	-0.04 [-0.28, 0.20]
Improved sanitation	-0.07 [-0.43, 0.29]	0.00 [-0.43, 0.42]	0.48 [-0.05, 1.01]	-0.02 [-0.09, 0.04]	-0.16 [-0.48, 0.17]
Income in USD	0.00 [-0.00, 0.00]	0.00 [-0.00, 0.00]	0.00 [-0.00, 0.00]	0.00 [-0.00, 0.00]	0.00 [0.00, 0.00] *
Housewife's years of schooling	-0.08 [-0.17, 0.01]	0.13 [0.02, 0.24] *	-0.04 [-0.18, 0.10]	0.00 [-0.02, 0.01]	-0.04 [-0.12, 0.05]
Houshold asset index	-0.07 [-0.16, 0.01]	0.03 [-0.08, 0.13]	0.02 [-0.10, 0.15]	0.00 [-0.02, 0.01]	0.00 [-0.08, 0.07]
Wash hand before cooking	0.03 [-0.31, 0.38]	0.17 [-0.23, 0.58]	-0.18 [-0.69, 0.33]	0.02 [-0.05, 0.08]	0.05 [-0.26, 0.36]
Wash hand after toilet	0.02 [-0.29, 0.34]	-0.2 [-0.58, 0.17]	0.08 [-0.39, 0.54]	0.01 [-0.05, 0.07]	0.05 [-0.23, 0.34]
Use toilet paper	0.01 [-0.29 0.31]	0.15 [-0.21, 0.51]	-0.39 [-0.84, 0.06]	0.02 [-0.03, 0.08]	0.04 [-0.23, 0.32]
Enteroaggregative E. coli positive	-0.27 [-0.54, -0.01]	-0.01 [-0.33, 0.30]	-0.02 [-0.42, 0.38]	0.00 [-0.05, 0.05]	0.10 [-0.14, 0.35]
Heat Stable Enterotoxigenic E. coli positive	0.16 [-0.11, 0.44]	-0.3 [-0.63, 0.03]	-0.18 [-0.59, 0.23]	0.04 [-0.01, 0.09]	0.02 [-0.23, 0.28]
Heat Labile Enterotoxigenic E. coli Positive	-0.01 [-0.44, 0.43]	-0.06 [-0.57, 0.46]	-0.05 [-0.69, 0.60]	-0.01 [-0.09, 0.07]	0.00 [-0.39, 0.40]
Shigella and Enteroinvasive E. coli positive	0.03 [-0.21, 0.28]	0.15 [-0.14, 0.44]	-0.20 [-0.56, 0.17]	-0.01 [-0.05, 0.04]	0.11 [-0.11, 0.33]
Shiga toxin producing E.coli positive	-0.11 [-0.64, 0.42]	-0.06 [-0.69, 0.57]	0.42 [-0.36, 1.21]	0.13 [0.03, 0.22] *	0.11 [-0.37, 0.60]
Typical Enteropathogenic E. coli positive	0.12 [-0.41, 0.64]	0.24 [-0.38, 0.87]	0.68 [-0.10, 1.46]	0.06 [-0.04, 0.16]	0.23 [-0.25, 0.71]
Atypical Enteropathogenic E. coli positive	0.38 [0.11, 0.65] *	0.11 [-0.22, 0.43]	0.10 [-0.30, 0.51]	0.00 [-0.05, 0.05]	0.07 [-0.18, 0.32]
Ambulatory glucose profile (AGP) level	0.00 [-0.01, 0.00]	0.01 [0.00, 0.01] *	0.00 [-0.00, 0.01]	0.00 [-0.00, 0.00]	0.00 [-0.00, 0.00]
C-reactive protein(CRP) level	0.01 [-0.02, 0.03]	-0.01 [-0.05, 0.02]	0.04 [0.00, 0.08] *	0.00 [-0.01, 0.00]	0.02 [-0.00, 0.04]
Zinc level	0.22 [-0.69, 1.14]	1.28 [0.19, 2.36] *	1.14 [-0.22, 2.49]	0.10 [-0.07, 0.26]	0.53 [-0.30, 1.36]
Ferritin level	0.00 [-0.00, 0.00]	0.00 [-0.00, 0.00]	0.00 [-0.01, 0.00]	0.00 [-0.00, 0.00]	0.00 [-0.00, 0.00]
Adjusted in linear regression model for age, sex, asset Index (including household all assets); housewife's years of education; wash indices (hand wash with soap before preparing food, hand wash with soap after using toilet, always use toilet paper); water treatment; individual E. coli pathotypes; inflammatory biomarkers (AGP, CRP); zinc; ferritin.
Dependent variable: AAT; MPO; NEO; calprotectin; Reg1B; Independent variables: Infection with E. coli pathotypes (EAEC, ETEC, Shigella/EIEC, STEC, EPEC).
Each column represents an individual model. Biomarker values were log-transformed prior to analysis. The adjusted coefficient with 95% confidence interval (CI) has been reported. The asterisk (*) denotes the statistical significance with a p-value < 0.05.
Abbreviations used: AAT, alpha-1 antitrypsin; MPO, myeloperoxidase; NEO, neopterin; Reg1B, regenerating family member 1 beta; EAEC, enteroaggregative E. coli; ETEC, enterotoxigenic E. coli; EIEC, enteroinvasive E. coli; STEC, Shiga toxin-producing E. coli; EPEC, enteropathogenic E. coli; CRP, C-reactive protein; AGP, Alpha-1-acid glycoprotein.
