# Supplementary material for: Association of Escherichia coli pathotypes with fecal markers of enteropathy and nutritional status among underweight adults in Bangladesh
Source: Front Cell Infect Microbiol. 2025 Apr 10;15:1553688. doi: 10.3389/fcimb.2025.1553688 (PMC12018316; doi:10.3389/fcimb.2025.1553688)
Supplement: Supplementary file 6 [file Table6.xlsx]

## Sheet: Table S6
Table S6
Factors associated with biomarkers for E. coli positive participant
Characteristics	MPO	NEO	REG1B	AAT	Calprotectin
Age in years	-0.07 [-0.12, -0.02]*	0.00 [-0.07, 0.07]	0.02 [-0.05, 0.09]	-0.03 [-0.07, 0.01]	-0.06 [-0.11, -0.01]*
Female sex	-1.17 [-2.31, -0.03]*	0.49 [-1.02, 1.99]	-1.15 [-2.73, 0.43]	-1.38 [-2.18, -0.59]*	-0.53 [-1.59, 0.53]
Use water treatment	0.11 [-0.67, 0.89]	-0.34 [-1.38, 0.70]	-0.56 [-1.65, 0.53]	-0.67 [-1.22, -0.12]*	-0.54 [-1.27, 0.18]
Improved sanitation	0.59 [-0.65, 1.83]	0.56 [-1.08, 2.2]	1.64 [-0.08, 3.36]	1.05 [0.18, 1.92]*	0.89 [-0.26, 2.04]
Income in USD	0.00 [0.00, 0.01]	0.00 [-0.01, 0.00]	0.00 [-0.01, 0.01]	0.00 [0.00, 0.01]*	0.00 [0.00, 0.01]
Housewife's years of schooling	-0.15 [-0.43, 0.12]	0.01 [-0.35, 0.38]	-0.16 [-0.54, 0.22]	-0.07 [-0.26, 0.12]	-0.13 [-0.39, 0.12]
Houshold asset index	-0.13 [-0.46, 0.2]	0.14 [-0.29, 0.57]	0.06 [-0.40, 0.51]	-0.25 [-0.48, -0.02]*	-0.18 [-0.48, 0.12]
Wash hand before cooking	-0.22 [-1.28, 0.85]	-0.55 [-1.96, 0.86]	-0.66 [-2.14, 0.82]	-0.18 [-0.92, 0.56]	-0.14 [-1.12, 0.85]
Wash hand after toilet	0.42 [-0.52, 1.35]	-0.71 [-1.95, 0.53]	0.36 [-0.94, 1.66]	0.19 [-0.46, 0.85]	0.33 [-0.54, 1.19]
Use toilet paper	-0.01 [-1.01, 0.99]	0.40 [-0.92, 1.72]	-0.20 [-1.59, 1.18]	0.29 [-0.41, 0.99]	0.18 [-0.74, 1.11]
Ambulatory glucose profile (AGP) level	0.00 [-0.01, 0.02]	0.02 [0.00, 0.03]*	0.00 [-0.02, 0.01]	0.00 [-0.01, 0.01]	0.01 [-0.01, 0.02]
C-reactive protein(CRP) level	0.05 [-0.04, 0.13]	-0.07 [-0.18, 0.05]	0.15 [0.03, 0.27]*	0.05 [-0.02, 0.11]	0.03 [-0.05, 0.11]
Zinc level	-1.08 [-3.7, 1.54]	3.45 [-0.02, 6.92]	0.50 [-3.14, 4.14]	0.35 [-1.48, 2.18]	-0.29 [-2.72, 2.14]
Ferritin level	-0.01 [-0.02, 0.00]	0.00 [-0.01, 0.01]	-0.01 [-0.02, 0.00]	0.00 [0.00, 0.01]	0.00 [-0.01, 0.00]
Adjusted in linear regression model for age, sex, asset Index (including household all assets); housewife's years of education; wash indices ( hand wash with soap before preparing food, hand wash with soap after using toilet, always use toilet paper); water treatment; inflammatory biomarkers (AGP, CRP); zinc; ferritin.
Dependent variable: AAT; MPO; NEO; calprotectin; Reg1B.
Each column represents an individual model. Biomarker values were log-transformed prior to analysis. The adjusted coefficient with 95% confidence interval (CI) has been reported. The asterisk (*) denotes the statistical significance with a p-value < 0.05.
Abbreviations used: AAT, alpha-1 antitrypsin; MPO, myeloperoxidase; NEO, neopterin; Reg1B, regenerating family member 1 beta; CRP, C-reactive protein; AGP, Alpha-1-acid glycoprotein.
