# Supplementary material for: Association of Escherichia coli pathotypes with fecal markers of enteropathy and nutritional status among underweight adults in Bangladesh
Source: Front Cell Infect Microbiol. 2025 Apr 10;15:1553688. doi: 10.3389/fcimb.2025.1553688 (PMC12018316; doi:10.3389/fcimb.2025.1553688)
Supplement: Supplementary file 7 [file Table7.xlsx]

## Sheet: Table S7
Table S7
Factors associated with biomarkers for E. coli negative participant
Characteristics	MPO	NEO	REG1B	AAT	Calprotectin
Age in years	-0.02 [-0.04, 0.00]	0.04 [0.01, 0.06]*	-0.05 [-0.08, -0.01]*	0.00 [-0.01, 0.00]	-0.02 [-0.04, 0.00]*
Female sex	0.51 [0.18, 0.84]*	0.22 [-0.17, 0.61]	-0.20 [-0.70, 0.30]	0.00 [-0.07, 0.06]	0.29 [-0.01, 0.59]
Use water treatment	-0.28 [-0.57, 0.00]	-0.17 [-0.5, 0.16]	0.18 [-0.25, 0.60]	-0.01 [-0.06, 0.05]	-0.02 [-0.28, 0.24]
Improved sanitation	-0.17 [-0.54, 0.21]	-0.08 [-0.52, 0.36]	0.33 [-0.23, 0.90]	-0.04 [-0.11, 0.03]	-0.23 [-0.57, 0.11]
Income in USD	0.00 [0.00, 0.00]*	0.00 [0.00, 0.00]	0.00 [0.00, 0.00]	0.00 [0.00, 0.00]	0.00 [0.00, 0.00]*
Housewife's years of schooling	-0.05 [-0.15, 0.05]	0.17 [0.05, 0.29]*	-0.03 [-0.19, 0.12]	-0.01 [-0.03, 0.01]	-0.02 [-0.12, 0.07]
Houshold asset index	-0.06 [-0.15, 0.03]	0.02 [-0.08, 0.13]	-0.01 [-0.14, 0.12]	0.00 [-0.02, 0.01]	0.01 [-0.07, 0.09]
Wash hand before cooking	0.07 [-0.29, 0.44]	0.31 [-0.12, 0.74]	-0.13 [-0.68, 0.42]	0.01 [-0.06, 0.08]	0.05 [-0.28, 0.39]
Wash hand after toilet	-0.05 [-0.39, 0.29]	-0.04 [-0.43, 0.35]	0.06 [-0.45, 0.56]	0.01 [-0.06, 0.07]	0.03 [-0.28, 0.33]
Use toilet paper	0.03 [-0.29, 0.35]	0.07 [-0.31, 0.44]	-0.41 [-0.9, 0.07]	0.02 [-0.04, 0.08]	0.08 [-0.22, 0.37]
Ambulatory glucose profile (AGP) level	0.00 [-0.01, 0.00]	0.01 [0.00, 0.01]*	0.00 [0.00, 0.01]*	0.00 [0.00, 0.00]	0.00 [0.00, 0.00]
C-reactive protein(CRP) level	0.00 [-0.03, 0.03]	-0.01 [-0.04, 0.03]	0.03 [-0.02, 0.07]	0.00 [-0.01, 0.00]	0.02 [-0.01, 0.04]
Zinc level	0.71 [-0.28, 1.69]	1.11 [-0.04, 2.26]	1.41 [-0.07, 2.89]	0.09 [-0.10, 0.28]	0.66 [-0.24, 1.56]
Ferritin level	0.00 [0.00, 0.00]	0.00 [0.00, 0.00]	0.00 [-0.01, 0.00]	0.00 [0.00, 0.00]	0.00 [0.00, 0.00]*
Adjusted in linear regression model for age, sex, asset Index (including household all assets); housewife's years of education; wash indices ( hand wash with soap before preparing food, hand wash with soap after using toilet, always use toilet paper); water treatment; inflammatory biomarkers (AGP, CRP); zinc; ferritin.
Dependent variable: AAT; MPO; NEO; calprotectin; Reg1B.
Each column represents an individual model. Biomarker values were log-transformed prior to analysis. The adjusted coefficient with 95% confidence interval (CI) has been reported. The asterisk (*) denotes the statistical significance with a p-value < 0.05.
Abbreviations used: AAT, alpha-1 antitrypsin; MPO, myeloperoxidase; NEO, neopterin; Reg1B, regenerating family member 1 beta; CRP, C-reactive protein; AGP, Alpha-1-acid glycoprotein.
