# Supplementary material for: Association of Escherichia coli pathotypes with fecal markers of enteropathy and nutritional status among underweight adults in Bangladesh
Source: Front Cell Infect Microbiol. 2025 Apr 10;15:1553688. doi: 10.3389/fcimb.2025.1553688 (PMC12018316; doi:10.3389/fcimb.2025.1553688)
Supplement: Supplementary file 8 [file Table8.xlsx]

## Sheet: Table S8
Table S8
Association of EED Biomarkers with Gender Variation
	Male					Female
Characteristics	MPO	NEO	REG1B	AAT	Calprotectin	MPO	NEO	REG1B	AAT	Calprotectin
Age in years	-0.04 [-0.09, 0.01]	-0.03 [-0.07, 0.02]	-0.04 [-0.11, 0.02]	-0.00 [-0.01, 0.01]	-0.02 [-0.06, 0.02]	-0.03 [-0.05, -0.00]	0.05 [0.02, 0.08]	-0.02 [-0.06, 0.02]	-0.00 [-0.01, 0.00]	-0.03 [-0.05, -0.00]
Use water treatment	-0.45 [-1.1, 0.20]	-0.25 [-0.79, 0.28]	0.08 [-0.74, 0.90]	-0.03 [-0.12, 0.07]	-0.34 [-0.82, 0.13]	-0.05 [-0.34, 0.23]	-0.20 [-0.59, 0.19]	0.05 [-0.41, 0.51]	0.00 [-0.06, 0.06]	0.07 [-0.21, 0.36]
Improved sanitation	-0.10 [-1.11, 0.91]	-0.17 [-1.00, 0.66]	-0.31 [-1.59, 0.97]	-0.02 [-0.17, 0.13]	0.08 [-0.66, 0.82]	-0.08 [-0.44, 0.29]	0.00 [-0.49, 0.50]	0.66 [0.07, 1.26]	-0.02 [-0.09, 0.06]	-0.28 [-0.64, 0.09]
Income in USD	0.00 [-0.00, 0.00]	0.00 [-0.00, 0.00]	0.00 [-0.01, 0.00]	0.00 [-0.00, 0.00]	0.00 [-0.00, 0.00]	0.00 [0.00, 0.00]	0.00 [-0.00, 0.00]	0.00 [-0.00, 0.00]	0.00 [-0.00, 0.00]	0.00 [-0.00, 0.00]
Housewife's years of schooling	-0.15[-0.37,0.06]	0.16 [-0.02, 0.33]	-0.02 [-0.29, 0.25]	-0.03 [-0.06, 0.00]	0.11 [-0.04, 0.26]	-0.06 [-0.16, 0.05]	0.11 [-0.03, 0.26]	-0.06 [-0.23, 0.11]	0.00 [-0.02, 0.02]	-0.09 [-0.2, 0.01]
Houshold asset index	-0.10 [-0.30, 0.09]	0.09 [-0.07, 0.25]	0.15 [-0.09, 0.40]	-0.01 [-0.04, 0.01]	-0.02 [-0.17, 0.12]	-0.09 [-0.18, 0.01]	-0.01 [-0.13, 0.12]	-0.02 [-0.17, 0.14]	-0.00 [-0.02, 0.02]	0.01 [-0.09, 0.10]
Wash hand before cooking	-0.27 [-1.26, 0.72]	0.29 [-0.52, 1.11]	-0.53 [-1.78, 0.73]	0.09 [-0.05, 0.24]	0.22 [-0.50, 0.94]	0.08 [-0.28, 0.44]	0.15 [-0.34, 0.63]	-0.17 [-0.75, 0.40]	-0.01 [-0.08, 0.06]	-0.03 [-0.38, 0.33]
Wash hand after toilet	-0.24 [-0.93, 0.45]	-0.05 [-0.61, 0.52]	0.52 [-0.36, 1.39]	0.01 [-0.09, 0.12]	-0.23 [-0.73, 0.28]	0.13 [-0.22, 0.49]	-0.22 [-0.70, 0.26]	-0.07 [-0.64, 0.5]	0.00 [-0.07, 0.07]	0.20 [-0.16, 0.55]
Use toilet paper	-0.20 [-0.95, 0.55]	-0.30 [-0.92, 0.31]	-0.31 [-1.26, 0.64]	0.03 [-0.08, 0.14]	-0.20 [-0.75, 0.34]	0.14 [-0.18, 0.46]	0.39 [-0.04, 0.82]	-0.43 [-0.95, 0.09]	0.02 [-0.04, 0.09]	0.15 [-0.17, 0.47]
Enteroaggregative E. coli positive	-0.75 [-1.40, -0.10]	0.51 [-0.02, 1.05]	0.11 [-0.71, 0.94]	-0.09 [-0.18, 0.01]	0.20 [-0.27, 0.68]	-0.07 [-0.36, 0.22]	-0.13 [-0.53, 0.26]	-0.03 [-0.5, 0.45]	0.04 [-0.02, 0.1]	0.07 [-0.22, 0.36]
Enterotoxigenic E. coli positive	0.10 [-0.52, 0.73]	-0.55 [-1.06, -0.03]	-0.06 [-0.85, 0.73]	0.00 [-0.09, 0.10]	0.08 [-0.38, 0.53]	0.16 [-0.12, 0.44]	-0.19 [-0.57, 0.19]	-0.17 [-0.62, 0.29]	0.04 [-0.02, 0.09]	0.00 [-0.28, 0.28]
Shigella and Enteroinvasive E. coli positive	0.15 [-0.44, 0.74]	0.25 [-0.24, 0.73]	-0.04 [-0.78, 0.71]	0.01 [-0.08, 0.10]	0.48 [0.05, 0.90]	0.04 [-0.23, 0.31]	0.14 [-0.23, 0.50]	-0.29 [-0.72, 0.15]	-0.01 [-0.06, 0.05]	0.01 [-0.26, 0.28]
Shiga toxin producing E.coli positive	-0.18 [-1.3, 0.94]	-0.30 [-1.22, 0.62]	0.91 [-0.51, 2.33]	0.29 [0.12, 0.45]	-0.14 [-0.96, 0.67]	-0.01 [-0.61, 0.59]	0.21 [-0.61, 1.02]	0.34 [-0.64, 1.31]	0.10 [-0.03, 0.22]	0.18 [-0.42, 0.78]
Enteropathogenic E. coli positive	0.46 [-0.19, 1.12]	-0.25 [-0.79, 0.28]	0.30 [-0.53, 1.12]	0.03 [-0.06, 0.13]	0.09 [-0.39, 0.57]	0.35 [0.06, 0.64]	0.22 [-0.18, 0.61]	0.09 [-0.38, 0.56]	0.00 [-0.06, 0.05]	0.05 [-0.24, 0.34]
Ambulatory glucose profile (AGP) level	0.00 [-0.01, 0.01]	0.01 [0.00, 0.02]	0.00 [-0.01, 0.01]	0.00 [-0.00, 0.00]	0.00 [-0.00, 0.01]	0.00 [-0.01,0.00]	0.01 [0.00, 0.01]	0.00 [-0.00, 0.01]	0.00 [-0.00, 0.00]	0.00 [-0.00, 0.00]
C-reactive protein(CRP) level	-0.06 [-0.13, 0.01]	-0.02 [-0.08, 0.04]	0.10 [0.01, 0.18]	-0.01 [-0.02, 0.00]	0.00 [-0.05, 0.05]	0.03 [0.00,0.06]	-0.01 [-0.05, 0.03]	0.02 [-0.03, 0.07]	0.00 [-0.01, 0.01]	0.03 [-0.00, 0.05]
Zinc level	0.41 [-1.61, 2.43]	0.70 [-0.96, 2.36]	1.67 [-0.89, 4.23]	0.29 [-0.01, 0.58]	2.28 [0.81, 3.75]	0.18 [-0.84, 1.20]	1.43 [0.04, 2.81]	0.69 [-0.96, 2.34]	-0.01 [-0.22, 0.2]	-0.23 [-1.25, 0.78]
Ferritin level	0.00 [-0.00, 0.00]	0.00 [-0.00, 0.00]	0.00 [-0.01, 0.00]	0.00 [-0.00, 0.00]	0.00 [-0.00, 0.01]	0.00 [0.00, 0.00]	0.00 [0.00, 0.01]	0.00 [-0.01, 0.00]	0.00 [0.00, 0.00]	0.00 [-0.00, 0.00]
